## Prediction of the Coding Sequences of Unidentified Human Genes. XII. The Complete Sequences of 100 New cDNA Clones from Brain Which Code for Large Proteins *in vitro*

Takahiro NAGASE, Ken-ichi ISHIKAWA, Mikita SUYAMA, Reiko KIKUNO, Makoto HIROSAWA, Nobuyuki MIYAJIMA, Ayako TANAKA, Hirokazu KOTANI, Nobuo NOMURA, and Osamu OHARA\*

Kazusa DNA Research Institute, 1532-3 Yana, Kisarazu, Chiba 292-0812, Japan

(Received 20 November 1998)

### Abstract

In this paper, we report the sequences of 100 cDNA clones newly determined from a set of size-fractionated human brain cDNA libraries and predict the coding sequences of the corresponding genes, named KIAA0819 to KIAA0918. These cDNA clones were selected on the basis of their coding potentials of large proteins (50 kDa and more) by using *in vitro* transcription/translation assays. The sequence data showed that the average sizes of the inserts and corresponding open reading frames are 4.4 kb and 2.5 kb (831 amino acid residues), respectively. Homology and motif/domain searches against the public databases indicated that the predicted coding sequences of 83 genes were similar to those of known genes, 59% of which (49 genes) were categorized as coding for proteins functionally related to cell signaling/communication, cell structure/motility and nucleic acid management. The chromosomal locations and the expression profiles of all the genes were also examined. For 54 clones including brain-specific ones, the mRNA levels were further examined among 8 brain regions (amygdala, corpus callosum, cerebellum, caudate nucleus, hippocampus, substantia nigra, subthalamic nucleus, and thalamus), spinal cord, and fetal brain.

**Key words:** large proteins; *in vitro* transcription/translation; cDNA sequencing; expression profile; chromosomal location; brain

### 1. Introduction

The importance of human cDNA sequencing is widely accepted because it is expected to offer protein coding information more directly than the genomic sequencing. As the human genome project has entered the sequencing phase and the information regarding human genomic sequences has explosively grown,<sup>1</sup> the sequencing of human cDNAs has been increasing its importance because it plays an indispensable role in complementation of the information encoded in human genomic sequences. Taking this into consideration, we initiated a human cDNA sequencing project 4 years ago,<sup>2</sup> and have already determined more than 800 human cDNAs to date.<sup>3</sup> The notable point of our cDNA project is that we focus our sequencing efforts on the analysis of large cDNAs (> 4 kb). Recently, we have selected cDNA clones to be sequenced on the basis of their protein coding potentials, and cDNA clones which code for large proteins (> 50 kDa) in brain are the current targets in our cDNA project.<sup>4</sup>

As an extension of the preceding reports, we herein

present the entire sequences of 100 new cDNA clones from brain cDNA libraries which encode large proteins *in vitro*. The specific features of the newly predicted protein sequences identified by the homology/motif analysis, the expression profiles, and the chromosomal locations of these 100 new cDNAs are also described. In particular, for 54 genes, the expression patterns in various regions of the central nervous system and fetal brain, besides 10 human tissues, were also examined. The expression profiling in these additional specimens was found to offer important pieces of information as a clue to identify their biological functions from a neuroscience viewpoint.

### 2. Materials and Methods

#### 2.1. Source and screening of cDNA clones

cDNA clones were randomly isolated from size-fractionated human brain cDNA libraries Nos. 2 to 5 (average insert size = 3.9, 4.5, 5.3 and 6.1 kb, respectively).<sup>4</sup> As the first screening, an *in vitro* transcription/translation system was applied to select cDNA clones which have the coding potentials of proteins with apparent molecular mass larger than 50 kDa. In the next step, the clones with unidentified sequences at both

Communicated by Michio Oishi

\* To whom correspondence should be addressed. Tel. +81-438-52-3913; Fax. +81-438-52-3914; E-mail: ohara@kazusa.or.jp

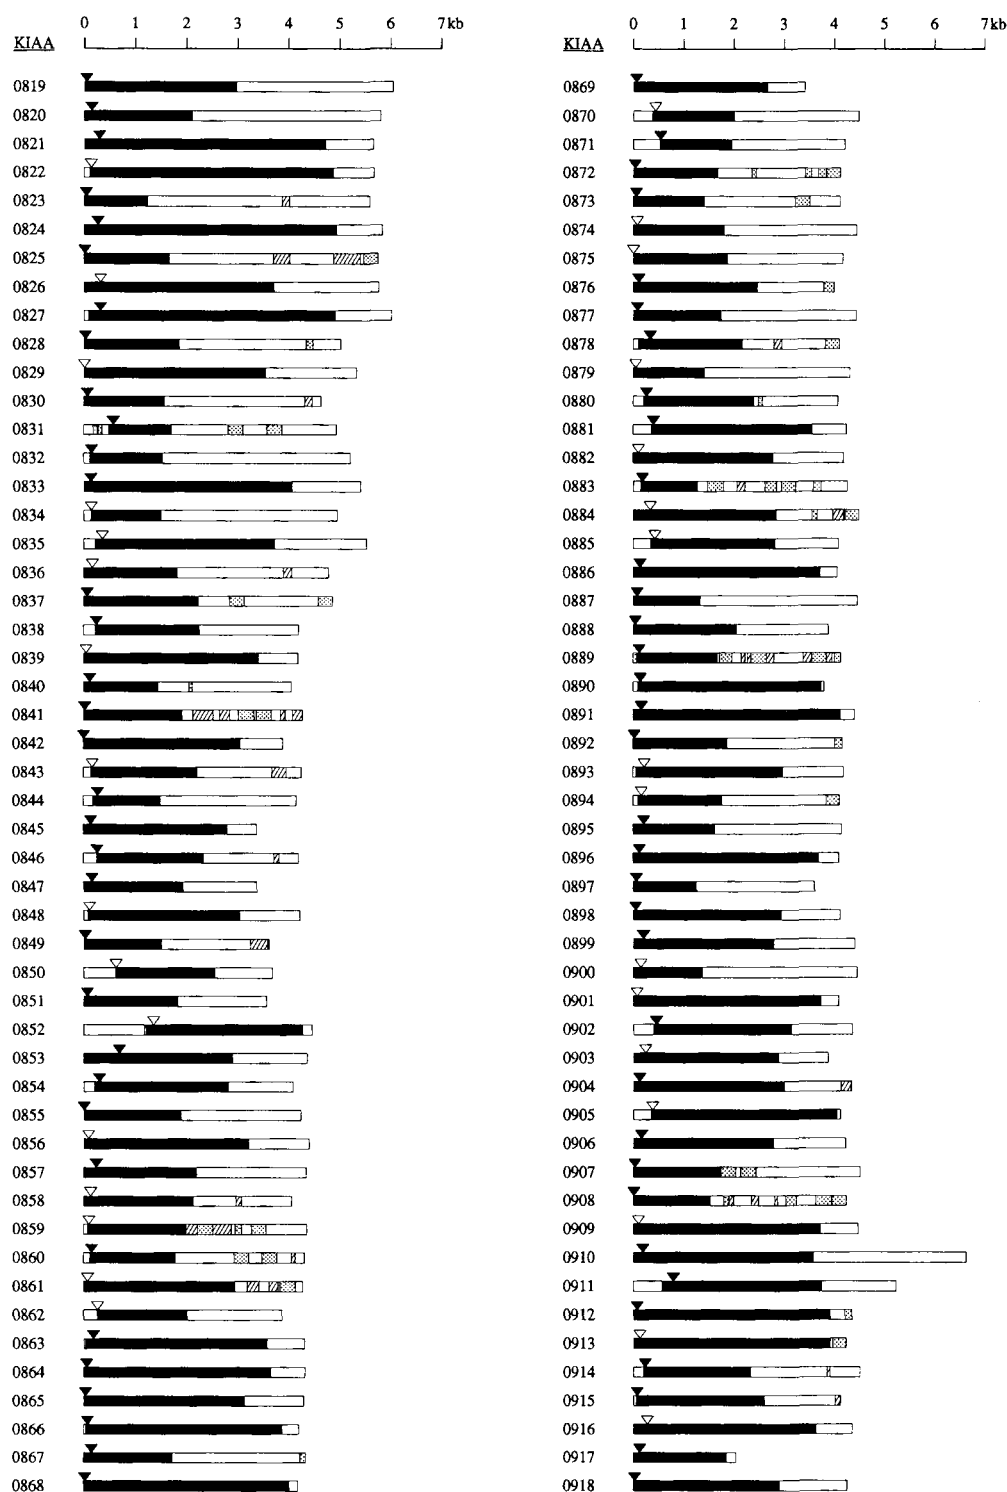

**Figure 1.** Physical maps of cDNA clones analyzed. The physical maps shown here were constructed on the basis of the sequence data of respective cDNA clones. The horizontal scale represents the cDNA length in kb, and the gene numbers corresponding to respective cDNAs are given on the left. The ORFs and untranslated regions are shown by solid and open boxes, respectively. The positions of the first ATG codons with or without the contexts of the Kozak's rule are indicated by solid and open triangles, respectively. RepeatMasker, which is a program that screens DNA sequences for interspersed repeats known to exist in mammalian genomes, was applied to detect repeat sequences in respective cDNA sequences (Smit, A.F.A. and Green, P., RepeatMasker at <http://ftp.genome.washington.edu/RM/RepeatMasker.html>). Short interspersed nucleotide elements (SINEs) including Alu and MIRs sequences and other repetitive sequences thus detected are displayed by dotted and hatched boxes, respectively.

Table 1. Information of sequence data and chromosomal locations of the identified genes.

| Gene number (KIAA) | Accession number <sup>a)</sup> | cDNA length (bp) <sup>b)</sup> | ORF length (amino acid residues) | Chromosomal location <sup>c)</sup> | Gene number (KIAA) | Accession number <sup>a)</sup> | cDNA length (bp) <sup>b)</sup> | ORF length (amino acid residues) | Chromosomal location <sup>c)</sup> |
|--------------------|--------------------------------|--------------------------------|----------------------------------|------------------------------------|--------------------|--------------------------------|--------------------------------|----------------------------------|------------------------------------|
| 0819               | AB020626                       | 6,049                          | 989                              | 22                                 | 0869               | AB020676                       | 3,408                          | 888                              | 5*                                 |
| 0820               | AB020627                       | 5,804                          | 702                              | 1*                                 | 0870               | AB020677                       | 4,484                          | 520                              | 8                                  |
| 0821               | AB020628                       | 5,659                          | 1,474                            | 19                                 | 0871               | AB020678                       | 4,207                          | 469                              | 4*                                 |
| 0822               | AB020629                       | 5,677                          | 1,581                            | 17                                 | 0872               | AB020679                       | 4,118                          | 547                              | 16*                                |
| 0823               | AB020630                       | 5,597                          | 412                              | 20*                                | 0873               | AB020680                       | 4,119                          | 466                              | 14*                                |
| 0824               | AB020631                       | 5,834                          | 1,644                            | 11                                 | 0874               | AB020681                       | 4,440                          | 601                              | 18                                 |
| 0825               | AB020632                       | 5,751                          | 553                              | 5                                  | 0875               | AB020682                       | 4,168                          | 621                              | 12                                 |
| 0826               | AB020633                       | 5,770                          | 1,236                            | 4*                                 | 0876               | AB020683                       | 3,997                          | 819                              | 19                                 |
| 0827               | AB020634                       | 6,019                          | 1,531                            | 16                                 | 0877               | AB020684                       | 4,436                          | 580                              | 7*                                 |
| 0828               | AB020635                       | 5,025                          | 619                              | 7*                                 | 0878               | AB020685                       | 4,099                          | 611                              | 5*                                 |
| 0829               | AB020636                       | 5,333                          | 1,183                            | 12*                                | 0879               | AB020686                       | 4,312                          | 453                              | 6                                  |
| 0830               | AB020637                       | 4,638                          | 523                              | 11*                                | 0880               | AB020687                       | 4,068                          | 709                              | 11                                 |
| 0831               | AB020638                       | 4,943                          | 379                              | 14                                 | 0881               | AB020688                       | 4,242                          | 1,049                            | 16                                 |
| 0832               | AB020639                       | 5,216                          | 458                              | 1*                                 | 0882               | AB020689                       | 4,186                          | 924                              | 4                                  |
| 0833               | AB020640                       | 5,414                          | 1,353                            | 1                                  | 0883               | AB020690                       | 4,253                          | 364                              | 8                                  |
| 0834               | AB020641                       | 4,957                          | 451                              | 7*                                 | 0884               | AB020691                       | 4,487                          | 943                              | 14                                 |
| 0835               | AB020642                       | 5,533                          | 1,121                            | 20                                 | 0885               | AB020692                       | 4,076                          | 798                              | 1*                                 |
| 0836               | AB020643                       | 4,791                          | 609                              | 15*                                | 0886               | AB020693                       | 4,053                          | 1,192                            | 2                                  |
| 0837               | AB020644                       | 4,868                          | 745                              | 5*                                 | 0887               | AB020694                       | 4,456                          | 443                              | 5                                  |
| 0838               | AB020645                       | 4,198                          | 669                              | 2                                  | 0888               | AB020695                       | 3,882                          | 684                              | 5*                                 |
| 0839               | AB020646                       | 4,193                          | 1,137                            | 1*                                 | 0889               | AB020696                       | 4,122                          | 518                              | 20                                 |
| 0840               | AB020647                       | 4,059                          | 483                              | 5*                                 | 0890               | AB020697                       | 3,800                          | 1,194                            | 3                                  |
| 0841               | AB020648                       | 4,283                          | 641                              | 19                                 | 0891               | AB020698                       | 4,401                          | 1,371                            | 3                                  |
| 0842               | AB020649                       | 3,896                          | 1,020                            | 1                                  | 0892               | AB020699                       | 4,164                          | 621                              | 19*                                |
| 0843               | AB020650                       | 4,256                          | 683                              | 5                                  | 0893               | AB020700                       | 4,195                          | 919                              | 1*                                 |
| 0844               | AB020651                       | 4,158                          | 407                              | 10*                                | 0894               | AB020701                       | 4,113                          | 533                              | 10                                 |
| 0845               | AB020652                       | 3,385                          | 933                              | 22*                                | 0895               | AB020702                       | 4,155                          | 540                              | 7*                                 |
| 0846               | AB020653                       | 4,204                          | 689                              | 2*                                 | 0896               | AB020703                       | 4,091                          | 1,230                            | 8*                                 |
| 0847               | AB020654                       | 3,386                          | 645                              | 15                                 | 0897               | AB020704                       | 3,605                          | 419                              | 1                                  |
| 0848               | AB020655                       | 4,220                          | 977                              | 3                                  | 0898               | AB020705                       | 4,111                          | 979                              | 17*                                |
| 0849               | AB020656                       | 3,622                          | 504                              | 16                                 | 0899               | AB020706                       | 4,405                          | 929                              | 11                                 |
| 0850               | AB020657                       | 3,682                          | 642                              | 1                                  | 0900               | AB020707                       | 4,450                          | 455                              | 13*                                |
| 0851               | AB020658                       | 3,572                          | 587                              | 3*                                 | 0901               | AB020708                       | 4,078                          | 1,215                            | X*                                 |
| 0852               | AB020659                       | 4,467                          | 970                              | 22 <sup>d)</sup>                   | 0902               | AB020709                       | 4,349                          | 893                              | 1                                  |
| 0853               | AB020660                       | 4,363                          | 967                              | 13                                 | 0903               | AB020710                       | 3,875                          | 962                              | 2                                  |
| 0854               | AB020661                       | 4,089                          | 837                              | 8*                                 | 0904               | AB020711                       | 4,336                          | 997                              | 17                                 |
| 0855               | AB020662                       | 4,241                          | 632                              | 15                                 | 0905               | AB020712                       | 4,110                          | 1,220                            | 4                                  |
| 0856               | AB020663                       | 4,404                          | 1,070                            | 15*                                | 0906               | AB020713                       | 4,217                          | 923                              | 3*                                 |
| 0857               | AB020664                       | 4,341                          | 733                              | 2                                  | 0907               | AB020714                       | 4,500                          | 564                              | 1*                                 |
| 0858               | AB020665                       | 4,059                          | 711                              | 13*                                | 0908               | AB020715                       | 4,226                          | 506                              | 2                                  |
| 0859               | AB020666                       | 4,356                          | 623                              | 1*                                 | 0909               | AB020716                       | 4,465                          | 1,234                            | 17                                 |
| 0860               | AB020667                       | 4,313                          | 541                              | 20*                                | 0910 <sup>e)</sup> | AB020717                       | 6,624                          | 1,193                            | 21                                 |
| 0861               | AB020668                       | 4,282                          | 982                              | 3                                  | 0911 <sup>e)</sup> | AB020718                       | 5,219                          | 981                              | 1*                                 |
| 0862               | AB020669                       | 3,872                          | 582                              | 10*                                | 0912 <sup>e)</sup> | AB020719                       | 4,345                          | 1,209                            | 15                                 |
| 0863               | AB020670                       | 4,313                          | 1,131                            | 18                                 | 0913 <sup>e)</sup> | AB020720                       | 4,227                          | 819                              | 10                                 |
| 0864               | AB020671                       | 4,319                          | 1,218                            | 17                                 | 0914 <sup>e)</sup> | AB020721                       | 4,449                          | 683                              | 4                                  |
| 0865               | AB020672                       | 4,300                          | 1,045                            | 13                                 | 0915 <sup>e)</sup> | AB020722                       | 4,065                          | 777                              | 17                                 |
| 0866               | AB020673                       | 4,199                          | 1,266                            | 16*                                | 0916 <sup>e)</sup> | AB020723                       | 4,354                          | 1,210                            | 13*                                |
| 0867               | AB020674                       | 4,339                          | 526                              | 12                                 | 0917 <sup>e)</sup> | AB020724                       | 2,038                          | 616                              | 14*                                |
| 0868               | AB020675                       | 4,185                          | 1,339                            | 7*                                 | 0918 <sup>e)</sup> | AB020725                       | 4,250                          | 966                              | 13                                 |

a) Accession numbers of DDBJ, EMBL and GenBank databases.

b) Values excluding poly(A) sequences.

c) Chromosome numbers identified by using GeneBridge 4 radiation hybrid panel unless specified. The chromosomal locations highlighted by asterisks were fetched from the UniGene database.

d) cDNA and ORF lengths were revised by direct analysis of the RT-PCR products.

e) Chromosome number determined by using CCR human-rodent hybrid panel.

**Table 2.** Functional classifications of the gene products based on homologies to known proteins and sequence motifs.

| Functional category <sup>a</sup> | Gene number (KIAA)      | Similarity class <sup>b</sup>                  | Homologous entry in the database <sup>c</sup>          | Accession no. <sup>d</sup> | Identities (%) <sup>e</sup> | Overlap (amino acid residues) <sup>f</sup> |
|----------------------------------|-------------------------|------------------------------------------------|--------------------------------------------------------|----------------------------|-----------------------------|--------------------------------------------|
| Cell signaling/communication     | 0821                    | H                                              | calcium-independent alpha-latrotoxin receptor (R)      | U72487                     | 98.1                        | 1474                                       |
|                                  | 0823                    | W                                              | MYPT2 (H)                                              | AB003062                   | 29.4                        | 306                                        |
|                                  | 0834                    | H                                              | Pftaire-1 (M)                                          | AF033655                   | 97.9                        | 429                                        |
|                                  | 0846                    | R                                              | ras guanyl releasing protein (R)                       | AF060819                   | 51.5                        | 718                                        |
|                                  | 0856                    | R                                              | X-like 1 protein (H) <sup>g</sup>                      | AJ005821                   | 54.1                        | 1084                                       |
|                                  | 0857                    |                                                | none <sup>h</sup>                                      |                            |                             |                                            |
|                                  | 0861                    | R                                              | KIAA0362 (H)                                           | AB002360                   | 43.0                        | 881                                        |
|                                  | 0862                    | I                                              | Ras-binding protein SUR-8 (H)                          | U61957                     | 99.8                        | 582                                        |
|                                  | 0868                    | R                                              | contactin associated protein Caspr (H)                 | U87223                     | 44.2                        | 1322                                       |
|                                  | 0871                    | W                                              | RaP2 interacting protein 8 (H)                         | U93871                     | 32.4                        | 182                                        |
|                                  | 0878                    | W                                              | Caenorhabditis elegans cosmid C07D10 (Ce) <sup>o</sup> | U13072                     | 24.6                        | 281                                        |
|                                  | 0880                    | R                                              | prostaglandin transporter (R)                          | Q00910                     | 42.8                        | 678                                        |
|                                  | 0881                    | R                                              | S/T-protein kinase SULU (Ce)                           | P46549                     | 37.4                        | 962                                        |
|                                  | 0882                    | W                                              | MIC1 protein (Sc)                                      | P53258                     | 37.3                        | 378                                        |
|                                  | 0886                    | R                                              | neuroendocrine-specific protein A (H)                  | A46583                     | 33.4                        | 685                                        |
|                                  | 0893                    | R                                              | Caenorhabditis elegans cosmid K06A5 (Ce) <sup>o</sup>  | AF039038                   | 39.3                        | 379                                        |
|                                  | 0894                    | W                                              | SH3-containing protein p4015 (R)                       | AF026505                   | 32.4                        | 352                                        |
|                                  | 0897                    | R                                              | LAR-interacting protein LIP1a (H)                      | S55552                     | 69.0                        | 400                                        |
|                                  | 0902                    | R                                              | KIAA0403 (H) <sup>o</sup>                              | AB007863                   | 38.1                        | 270                                        |
|                                  | 0904                    | R                                              | protein kinase cdc2-like (H)                           | A38197                     | 82.7                        | 394                                        |
| 0910                             | I                       | synaptojanin (H)                               | AF009039                                               | 97.3                       | 1225                        |                                            |
| 0915                             | R                       | guanine nucleotide regulatory protein tim1 (H) | U02082                                                 | 35.9                       | 499                         |                                            |
| 0917                             | H                       | Sly1 protein (R)                               | JC4674                                                 | 96.8                       | 599                         |                                            |
| Cell structure/motility          | 0819                    | W                                              | cell surface glycoprotein 1 precursor (Ct)             | Q06852                     | 24.6                        | 691                                        |
|                                  | 0820                    | H                                              | dynamilin 3 (R)                                        | Q08877                     | 96.2                        | 679                                        |
|                                  | 0843                    | R                                              | actin-binding double-zinc-finger protein abLIM (H)     | AF005654                   | 49.8                        | 652                                        |
|                                  | 0845                    | I                                              | neurofilament triplet H protein (H)                    | P12036                     | 99.2                        | 933                                        |
|                                  | 0851                    | R                                              | recessive suppressor of secretory defect (Sc)          | P32368                     | 35.4                        | 591                                        |
|                                  | 0853                    | W                                              | trichohyalin (H)                                       | P09406                     | 25.9                        | 247                                        |
|                                  | 0855                    | W                                              | cis-golgi matrix protein GM130 (R)                     | Q62839                     | 29.4                        | 884                                        |
|                                  | 0865                    | W                                              | ALR (H)                                                | AF010403                   | 28.8                        | 417                                        |
|                                  | 0866                    | H                                              | myosin heavy chain, smooth muscle isoform (Rb)         | P35748                     | 97.6                        | 1264                                       |
|                                  | 0899                    | H                                              | alpha-adaptin (R)                                      | P18484                     | 97.3                        | 929                                        |
|                                  | 0903                    | W                                              | spectrin beta chain, erythrocyte (M)                   | P15508                     | 21.2                        | 754                                        |
|                                  | 0905                    | W                                              | Web1 protein (Sc)                                      | P38968                     | 24.2                        | 1338                                       |
|                                  | 0906                    | R                                              | integral membrane glycoprotein GP210 precursor (R)     | P11654                     | 80.6                        | 923                                        |
|                                  | 0912                    | W                                              | NuMA protein (X)                                       | Y07624                     | 22.7                        | 948                                        |
|                                  | Nucleic acid management | 0824                                           | I                                                      | PCF11p homolog (H)         | AF046935                    | 99.9                                       |
| 0827                             |                         | W                                              | transcription factor NFATx (M)                         | D85612                     | 28.6                        | 961                                        |
| 0829                             |                         | H                                              | TIP120 (R)                                             | D87671                     | 99.7                        | 1183                                       |
| 0832                             |                         | R                                              | steroid hormone receptor ERR2 (H)                      | P11475                     | 77.0                        | 435                                        |
| 0835                             |                         | I                                              | myelin transcription factor 1 (H)                      | Q01538                     | 93.5                        | 536                                        |
| 0854                             |                         | R                                              | homeotic protein zhx-1 (M)                             | JC4863                     | 40.5                        | 893                                        |
| 0864                             |                         | W                                              | p116Rip (M) <sup>o</sup>                               | U73200                     | 86.3                        | 350                                        |
| 0867                             |                         | W                                              | transcription factor-like protein 4 beta (M)           | JC5332                     | 26.9                        | 227                                        |
| 0885                             |                         | H                                              | UNR protein (R) <sup>o</sup>                           | P18395                     | 98.6                        | 798                                        |
| 0890                             |                         | W                                              | pre-mRNA splicing factor RNA helicase PRP16 (Sc)       | P15938                     | 34.0                        | 532                                        |
| 0901                             |                         | R                                              | Caenorhabditis elegans cosmid F41H10 (Ce) <sup>o</sup> | U61954                     | 38.7                        | 791                                        |
| 0916                             | I                       | protein associated with Myc (H)                | AF075587                                               | 99.9                       | 1210                        |                                            |
| Metabolism                       | 0828                    | I                                              | S-adenosyl homocysteine hydrolase homolog (H)          | U82761                     | 91.8                        | 500                                        |
|                                  | 0836                    | H                                              | C5-glucuronol epimerase (B)                            | AF003927                   | 98.9                        | 444                                        |
|                                  | 0837                    | H                                              | long-chain-fatty-acid--CoA ligase, brain isozyme (R)   | P33124                     | 90.7                        | 697                                        |
|                                  | 0838                    | H                                              | glutaminase, kidney isoform precursor (R)              | P13264                     | 93.9                        | 674                                        |
|                                  | 0879                    | R                                              | plasma-cell membrane glycoprotein PC-1 (M)             | P06802                     | 39.5                        | 390                                        |
| Protein management               | 0887                    | W                                              | probable membrane protein YDL091c (Sc) <sup>o</sup>    | S67627                     | 28.5                        | 302                                        |
|                                  | 0891                    | R                                              | ubiquitin protease Unph (H)                            | U20657                     | 35.2                        | 824                                        |
|                                  | 0896                    | I                                              | 100 kD protein (H)                                     | Q62671                     | 97.8                        | 889                                        |
| Unclassified                     | 0822                    | W                                              | Caenorhabditis elegans cosmid F12B6 (Ce)               | AF003138                   | 24.6                        | 1416                                       |
|                                  | 0826                    | W                                              | Caenorhabditis elegans cosmid F21H11 (Ce)              | U11279                     | 21.9                        | 356                                        |
|                                  | 0830                    | R                                              | K123 protein (C)                                       | Y14970                     | 32.3                        | 263                                        |
|                                  | 0833                    | W                                              | Caenorhabditis elegans cosmid T05C1 (Ce)               | U28992                     | 26.5                        | 181                                        |
|                                  | 0839                    | W                                              | Caenorhabditis elegans cosmid T22C1 (Ce)               | Z75550                     | 22.8                        | 334                                        |
|                                  | 0840                    | W                                              | hypothetical 54.9 kD protein C02F5.7 (Ce)              | P34284                     | 29.7                        | 384                                        |
|                                  | 0849                    | R                                              | F40F12.5 protein (Ce)                                  | S42834                     | 33.0                        | 455                                        |
|                                  | 0850                    | W                                              | Caenorhabditis elegans cosmid R09A8 (Ce)               | Z68009                     | 28.9                        | 724                                        |
|                                  | 0852                    | W                                              | KIAA0136 (H)                                           | Q14149                     | 24.9                        | 1013                                       |
|                                  | 0858                    | I                                              | zinc-finger domain-containing protein (H)              | U90654                     | 100.0                       | 341                                        |
|                                  | 0859                    | R                                              | Caenorhabditis elegans cosmid C01B10 (Ce)              | U58757                     | 35.5                        | 617                                        |
|                                  | 0863                    | R                                              | hypocotyl specific gene (Dc)                           | AB000505                   | 33.2                        | 349                                        |
|                                  | 0872                    | W                                              | Caenorhabditis elegans cosmid F41H10 (Ce)              | U61954                     | 28.4                        | 443                                        |
|                                  | 0875                    | W                                              | hypothetical protein HI 1558 (Hi)                      | P45252                     | 25.9                        | 185                                        |
|                                  | 0876                    | W                                              | peregrin (H)                                           | P55201                     | 28.0                        | 432                                        |
|                                  | 0877                    | R                                              | DPY-19 protein (Ce)                                    | P34413                     | 41.1                        | 555                                        |
|                                  | 0884                    | H                                              | tulip 1 (R)                                            | AF041106                   | 93.5                        | 230                                        |
|                                  | 0888                    | W                                              | probable chitin biosynthesis protein C6G9.12 (Sp)      | Q92357                     | 24.8                        | 322                                        |
|                                  | 0892                    | W                                              | Caenorhabditis elegans cosmid C09H6 (Ce)               | Z81466                     | 23.0                        | 600                                        |
|                                  | 0898                    | W                                              | Ro protein (M)                                         | L27990                     | 25.1                        | 263                                        |
|                                  | 0900                    | R                                              | KIAA0269 (H)                                           | Q92558                     | 47.3                        | 514                                        |
|                                  | 0907                    | W                                              | hypothetical 59.0 kD protein (Sp)                      | Q09911                     | 25.8                        | 461                                        |
|                                  | 0909                    | W                                              | Caenorhabditis elegans cosmid T05C1 (Ce)               | U28992                     | 33.2                        | 223                                        |

|             |      |   |                                           |        |      |     |
|-------------|------|---|-------------------------------------------|--------|------|-----|
|             | 0911 | W | Caenorhabditis elegans cosmid B0034 (Ce)  | U23528 | 29.4 | 991 |
|             | 0913 | W | Caenorhabditis elegans cosmid R09E10 (Ce) | Z70287 | 34.8 | 181 |
|             | 0914 | R | clone 23909 (H)                           | U79304 | 40.2 | 261 |
| No homology | 0825 |   | none                                      |        |      |     |
|             | 0831 |   | none                                      |        |      |     |
|             | 0841 |   | none                                      |        |      |     |
|             | 0842 |   | none                                      |        |      |     |
|             | 0844 |   | none                                      |        |      |     |
|             | 0847 |   | none                                      |        |      |     |
|             | 0848 |   | none                                      |        |      |     |
|             | 0860 |   | none                                      |        |      |     |
|             | 0869 |   | none                                      |        |      |     |
|             | 0870 |   | none                                      |        |      |     |
|             | 0873 |   | none                                      |        |      |     |
|             | 0874 |   | none                                      |        |      |     |
|             | 0883 |   | none                                      |        |      |     |
|             | 0889 |   | none                                      |        |      |     |
|             | 0895 |   | none                                      |        |      |     |
|             | 0908 |   | none                                      |        |      |     |
|             | 0918 |   | none                                      |        |      |     |

- a) Classifications based on the annotations of their homologous protein entries in the databases.
- b) The gene products were grouped into four similarity classes according to the sequence identities obtained by the GAP program: I, identical to known human gene products (sequence identity, > 90%); H, homologous to known non-human gene products (sequence identity, > 90%); R, related to some known gene products (sequence identity, 30 to 90%); W, very weakly related to known gene products (sequence identity, < 30%).
- c) Organisms in which these entries were identified are given in parentheses: B, bovine; C, chicken; Ce, *Caenorhabditis elegans*; Ct, *Clostridium thermocellum*; Dc, *Daucus carota*; H, human; Hi, *Haemophilus influenzae*; M, mouse; R, rat; Rb, Rabbit; Sp, *Schizosaccharomyces pombe*; X, *Xenopus laevis*.
- d) Accession numbers of homologous entries in DDBJ/EMBL/GenBank/OWL/SWISS-PROT/PIR database are shown.
- e) The values were obtained by the FASTA program.
- f) Classifications based on the sequence motifs or domains.

ends were chosen by single-pass sequencing and homology search against GenBank database (release 102.0) excluding expressed sequence tags and genomic sequences.<sup>3</sup> Although cDNAs with unidentified sequences were analyzed as a general rule, cDNA clones with much larger open reading frames (ORFs) than the registered ones in the public databases were also included in this report as exceptions.

## 2.2. Gene expression profiles

Expression profiles of the newly identified genes were examined by reverse transcription-coupled polymerase chain reaction (RT-PCR), products of which were quantified by using enzyme-linked immunosorbent assay (ELISA) as described previously.<sup>3</sup> On the basis of ELISA control curves using PCR products derived from serial dilutions of a known amount of the authentic plasmids, the ELISA data were converted to the mRNA levels expressed as equivalent amounts of the cDNA plasmid. The digitized mRNA levels calculated using a software package, SOFTmax PRO (Molecular Device, Co.), were then displayed by color codes for facilitating survey of many gene expression profiles at a glance. In this study, poly(A)<sup>+</sup> RNAs from 8 brain regions (amygdala, corpus callosum, cerebellum, caudate nucleus, hippocampus, substantia nigra, subthalamic nucleus, and thalamus), spinal cord, fetal brain, and fetal liver were subjected to the RT-PCR ELISA in addition to those from 10 adult human tissues as described previously.<sup>3</sup> All the

poly(A)<sup>+</sup> RNAs were purchased from CLONTECH Laboratories, Inc. (Palo Alto, CA, USA).

## 2.3. Other methods

DNA sequencing and homology searches of the predicted protein-coding sequences were carried out as described previously.<sup>3,4</sup> When the possibility of spurious interruption of ORF was noticed, the interruption was experimentally revised by direct sequencing of the RT-PCR products.<sup>5</sup> Chromosomal locations of newly identified genes were determined by using human-rodent hybrid panels, GeneBridge 4 (Research Genetics Inc., USA) or CCR (Coriell Cell Repositories, USA), if their mapping data were not available in the UniGene database (<http://www.ncbi.nlm.nih.gov/UniGene>).<sup>3</sup> For genes whose chromosomal locations were described in the UniGene database, we did not perform the radiation hybrid mapping experiments. In this case, we confirmed that the primer sets used in the determination of chromosomal location in the UniGene database were consistent with the sequences of the genes we determined. The actual primer sequences and the PCR conditions used for the radiation hybrid mapping are accessible through the World Wide Web at <http://www.kazusa.or.jp>.

**Table 3.** The newly identified genes in paralogous relationship with genes characterized by our cDNA project.

| New gene | Paralogous gene        | Accession no. <sup>a)</sup> | Identities (%) <sup>b)</sup> | Corresponding gene product                           |
|----------|------------------------|-----------------------------|------------------------------|------------------------------------------------------|
| KIAA0821 | KIAA0768               | AB018311                    | 53.0                         | latrophilin-related protein 1 <sup>11</sup>          |
|          | KIAA0786               | AB018329                    | 64.7                         | latrophilin-related protein 1                        |
| KIAA0829 | KIAA0667               | AB014567                    | 57.5                         | TBP-interacting protein TIP120 <sup>12</sup>         |
| KIAA0833 | KIAA0908 <sup>c)</sup> | AB020715                    | 41.7                         | uncharacterized                                      |
| KIAA0835 | KIAA0535               | AB011107                    | 51.3                         | myelin transcription factor <sup>13</sup>            |
| KIAA0843 | KIAA0059               | D31883                      | 56.5                         | actin-binding protein <sup>14</sup>                  |
| KIAA0850 | KIAA0132               | D50922                      | 30.9                         | ring canal protein <sup>15</sup>                     |
| KIAA0854 | KIAA0395               | AB007855                    | 38.0                         | homeotic protein zhx-1 <sup>16</sup>                 |
| KIAA0861 | KIAA0362               | AB002360                    | 42.7                         | guanine nucleotide exchange factor Dbs <sup>17</sup> |
|          |                        | D86970                      | 33.1                         | smooth muscle myosin heavy chain <sup>18</sup>       |
| KIAA0866 | KIAA0216               | D86970                      | 33.1                         | smooth muscle myosin heavy chain                     |
|          | KIAA0389               | AB002387                    | 31.1                         | uncharacterized                                      |
| KIAA0875 | KIAA0677               | AB014577                    | 43.2                         | uncharacterized                                      |
| KIAA0881 | KIAA0676               | AB014576                    | 61.1                         | uncharacterized                                      |
| KIAA0890 | KIAA0529               | AB011101                    | 32.0                         | uncharacterized                                      |
| KIAA0896 | KIAA0654               | AB014554                    | 65.8                         | LAR-interacting protein LIP1a <sup>19</sup>          |
| KIAA0899 | KIAA0269               | D87459                      | 51.0                         | uncharacterized                                      |
| KIAA0901 | KIAA0403               | AB007863                    | 34.6                         | uncharacterized                                      |
| KIAA0909 | KIAA0348               | AB002346                    | 45.7                         | synaptojanin <sup>20</sup>                           |
| KIAA0918 | KIAA0848 <sup>c)</sup> | AB020655                    | 43.7                         | uncharacterized                                      |

a) Accession numbers of paralogous genes in DDBJ/EMBL/GenBank database are shown.

b) The values of the overall identities of amino acid residues were obtained by the GAP program.

c) These genes are reported in this paper.

### 3. Results and Discussion

#### 3.1. Sequence analysis and prediction of protein-coding regions in cDNA clones

cDNA clones were selected from a set of size-fractionated cDNA libraries under the criteria described in the previous studies;<sup>3</sup> they are uncharacterized in the public databases and can direct synthesis of proteins larger than 50 kDa *in vitro*. One hundred clones thus selected were subjected to sequencing of entire inserts. Some clones seemed to carry spurious coding interruption caused by errors of the reverse transcriptase or retained intron sequences. For these cases, the regions causing ORF interruption were examined by direct sequencing of the RT-PCR products. It should be noted that only the main RT-PCR products were taken into consideration. According to the results of these confirmations, the spurious interruptions were found in the following clones: the ORF in KIAA0915 was interrupted by a 49-bp deletion; KIAA0916 carried a nonsense mutation in the ORF; KIAA0917 was found to carry relatively long insertions probably corresponding to intronic sequences; the ORFs in 5 clones (KIAA0910-0913 and KIAA0918) were frame-shifted by a short insertion or deletion (< 5 nucleotide residues). For those genes, the revised sequences by the RT-PCR experiments, not the actual cloned cDNA sequences, were deposited to the GenBank/EMBL/DDBJ databases and used for prediction of protein coding sequences. In particular, KIAA0914 was found to generate

two alternative forms without causing the ORF interruption, and the nucleotide sequence with a 42-bp insertion was deposited to the public databases. The sequence data revealed that the average sizes of these cDNA inserts and of their ORFs were 4.4 kb and 2.5 kb (corresponding to 831 amino acid residues), respectively. Physical maps of the 100 cDNA clones analyzed are shown in Fig. 1, where the ORFs and the first ATG codons in respective ORFs are indicated by solid boxes and triangles, respectively. The in-frame termination codons upstream of the first ATG codon were identified in 44 clones, among which 27 clones carried the ATG codon within the context of Kozak's rule.<sup>6</sup> In Fig. 1, short interspersed nucleotide elements (Alu and MIRs sequences) and other repetitive sequences detected using the RepeatMasker program are indicated by dotted and hatched boxes, respectively. Table 1 lists the gene codes (KIAA numbers), the accession numbers of the nucleotide sequences in GenBank/EMBL/DDBJ databases, the sizes of the cDNA inserts and the identified ORF, and the chromosomal locations of the respective genes. The chromosomal locations of 44 genes, which are highlighted by asterisks, were fetched from the UniGene database while the remaining 56 chromosomal locations were experimentally determined in this study.

#### 3.2. Functional classification of predicted gene products

To classify the gene products predicted from the cDNA sequences according to their possible functions,

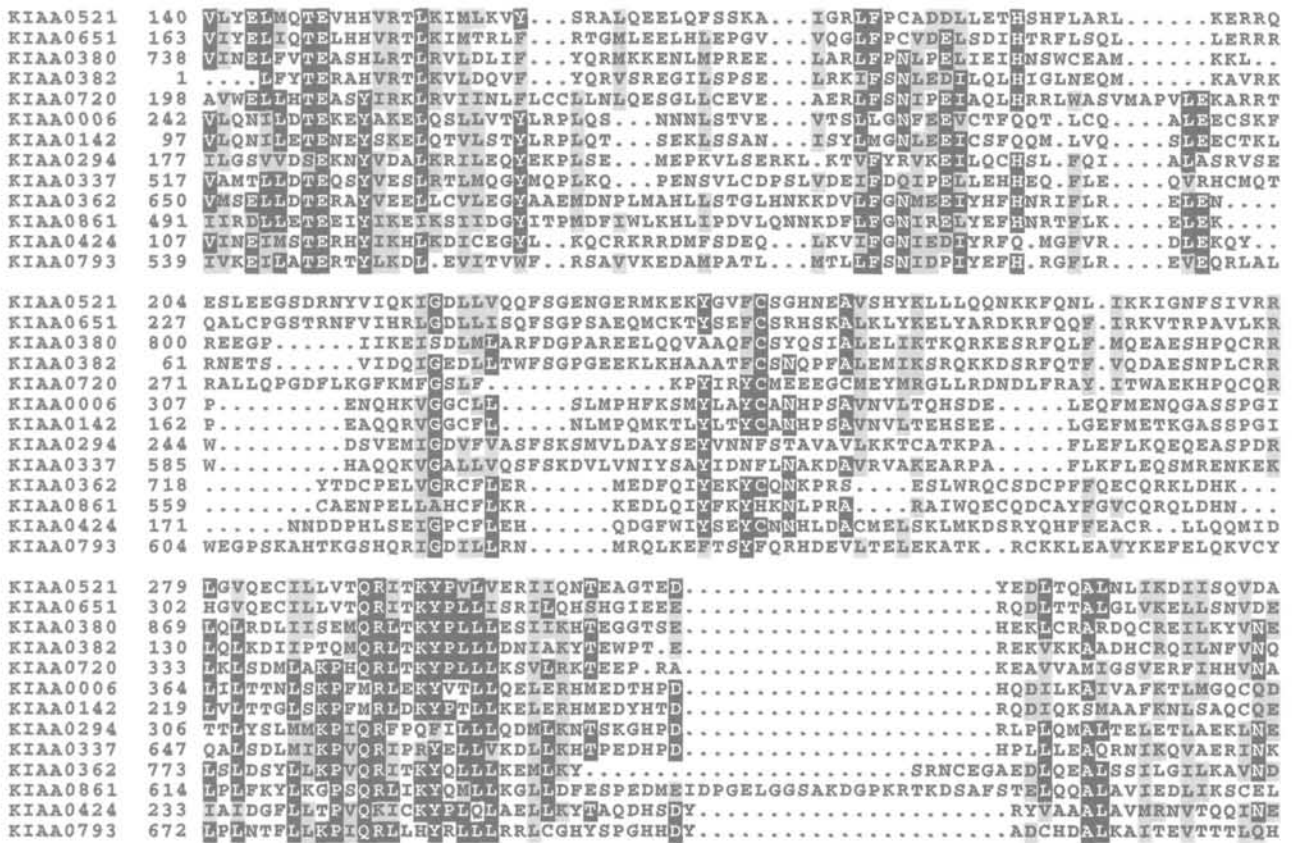

**Figure 2.** Multiple sequence alignment of the 13 DH domains. The DH domains of 13 KIAA genes were aligned by the PILEUP program. Identical residues are illustrated in black while conserved residues are in gray. Numerals represent the number of amino acid residues in respective genes. Gene names are given at the left.

the similarities of the sequences were examined against DNA and protein databases [GenBank (release 109.0), OWL (release 30.3) databases] by using the FASTA program of Wisconsin Sequence Analysis Package™ (version 8; Genetics Computer Group, Inc., USA). Motifs and profile entries in the PROSITE database (release 15.0) were also searched for by using the MOTIFS program in the Wisconsin Sequence Analysis Package and pftools program (ftp://ulrec3.unil.ch/pub/pftools), respectively. Furthermore, the Pfam database (release 3.2; http://pfam.wustl.edu), which is a large collection of multiple sequence alignments and hidden Markov models covering many common protein domains,<sup>7</sup> were also used for identification of functional domains in the predicted protein sequences (http://hmmer.wustl.edu). Homology searches against these databases revealed that the predicted coding sequences of 83 genes were found to exhibit significant similarities to those of known genes or specific domains/motifs, and 59% of them were classified into protein groups functionally related to cell signaling/communication, cell structure/motility and nucleic acid management. The functional classifications of these newly identified genes on the basis of this homology/motif analysis are summarized in Table 2.

Interesting features to be noted are summarized below.

1. Nineteen newly identified genes constitute 17 independent paralogous groups together with the genes characterized in our cDNA project (Table 3). For this analysis, genes which exhibit significant similarities throughout the protein-coding sequences, not in distinct domains or motifs, have been assigned as those with a paralogous relationship. Among these paralogous groups, genes in 7 groups were annotated “uncharacterized.”
2. The membrane-spanning regions in the gene products predicted from the cDNA sequences were predicted by SOSUI, which is a program for classification and secondary structure prediction for membrane proteins.<sup>8</sup> By using this program, more than 8 membrane-spanning segments in single polypeptides were predicted in four gene products analyzed in this paper (KIAA0821, 8 segments; KIAA0822, 14 segments; KIAA0877, 10 segments; KIAA0880, 8 segments). These genes are likely to encode receptors or ion channels or transporters. In fact, KIAA0821 and KIAA0880 showed significant sequence similarities against calcium-independent alpha-latrotoxin



A

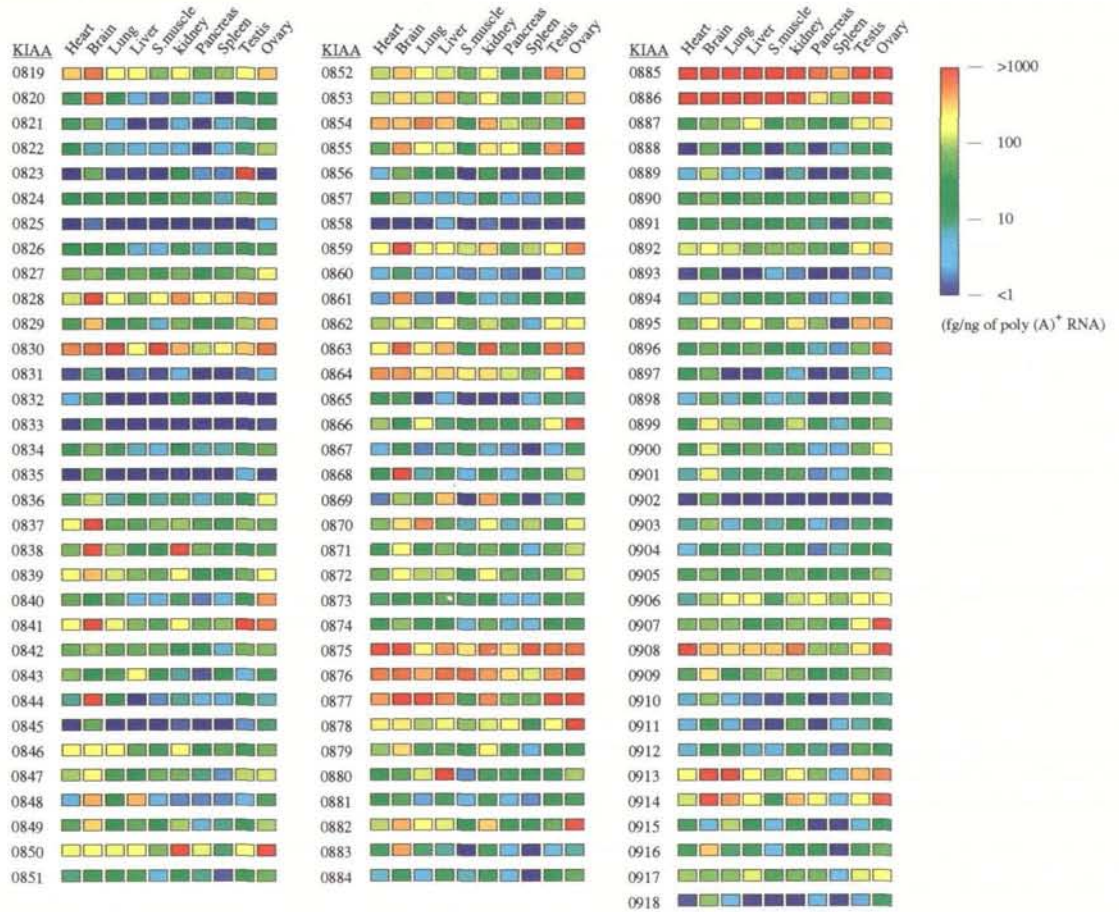

B

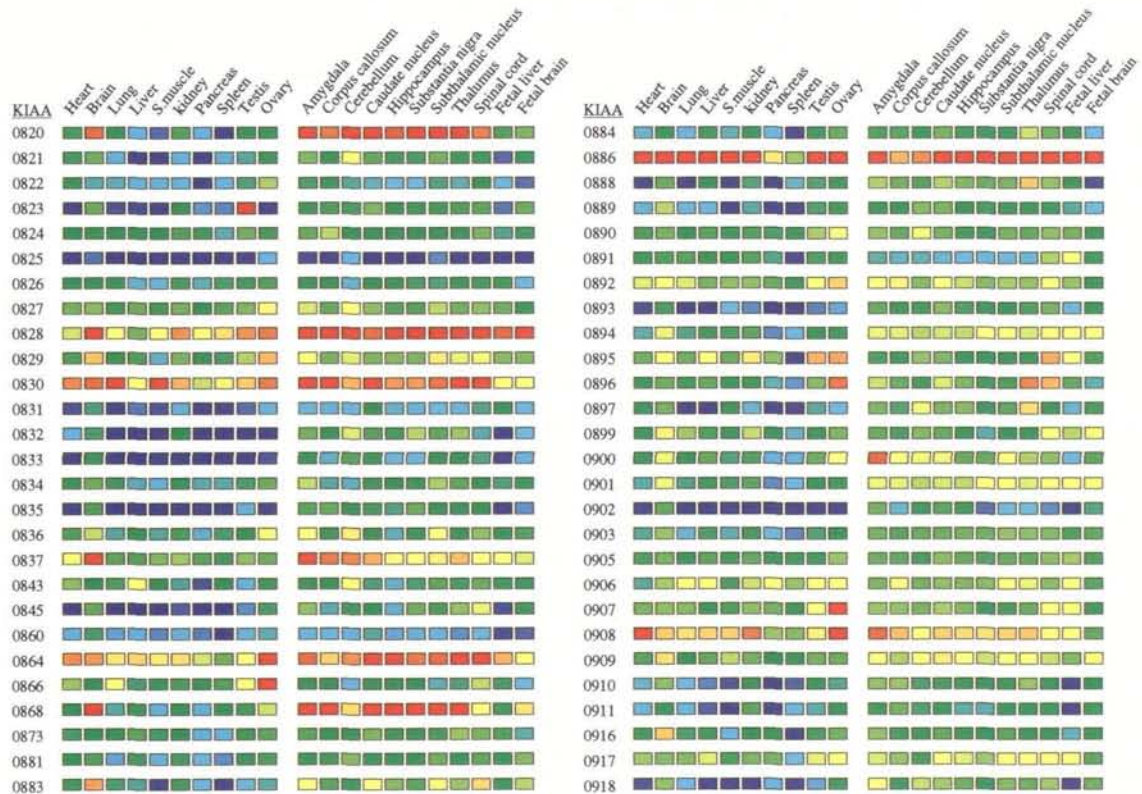



receptor and prostaglandin transporter, respectively (Table 2).

3. A protein domain search against the Pfam database<sup>7</sup> revealed that the Dbl homology (DH) domain<sup>9</sup> (HMM file, PF00621.pfam [RhoGEF]) and *Hect* domain<sup>10</sup> (HMM file, PF00632.pfam) are present in KIAA0861 and KIAA0896, respectively. Both domains were frequently found in the predicted gene products in our cDNA project. To examine the relative similarity among the DH-domain containing proteins, 13 DH domains in KIAA gene products were aligned by the PILEUP program in the Wisconsin Sequence Analysis Package (Fig. 2). As shown in Fig. 2, the region with the highest degree of similarity within the DH domain was characterized by a consensus sequence, Gln-Arg-Leu/Ile-Xaa-Lys-Tyr-Pro-Leu-Leu-Leu. Although the sequence identity of the DH domains in these proteins was not extremely high, the DH domains in all these predicted proteins except KIAA0337 are followed by Pleckstrin-homologous (PH) domain, which is thought to be involved in protein-protein interaction. The sequence diversity of the DH-containing human proteins suggested the existence of multiple signaling cascades in higher eukaryote since the DH domains are found in only four predicted proteins (ROM1, YLR371W, CDC24 and FUS2) in *Saccharomyces cerevisiae*.
4. Protein motif search against PROSITE database revealed that protein kinase signatures are present in three genes (KIAA0834, KIAA881 and KIAA0904).

### 3.3. Expression profiles of predicted genes

Figure 3A shows the tissue expression profiles of 100 human cDNAs newly identified in this study. Although RT-PCR ELISA cannot be highly accurate in quantification in an analytical sense, we consider it reliable enough as a screening method of genes according to their expression patterns.<sup>3</sup> However, from a neuroscientific viewpoint, the expression profiles among 10 tissues are not always satisfactory for extracting clues to identify their biological significance. Thus, we examined whether or not more neuroscientifically relevant information can be obtained by expanding the range of samples subjected to expression profiling. In this context, we analyzed the expression patterns of 54 randomly selected new genes in

8 brain regions (amygdala, corpus callosum, cerebellum, caudate nucleus, hippocampus, substantia nigra, subthalamic nucleus, and thalamus), spinal cord, and fetal brain in addition to 10 human tissues. In Fig. 3B, the expression profiles of these 54 genes in various regions of the central nervous system and fetal brain are shown together with those in 10 human tissues. Although mRNAs in whole brain also contains those from these various brain regions, the majority of whole brain mRNAs is derived from cerebrum and thus the mRNA levels in whole brain is expected to be similar to those in the cerebrum. Thus, even if the mRNA level of a gene of interest in adult whole brain is low, it can happen that a particular region of the central nervous system or fetal brain contained a significant amount of the mRNA. Figure 3B shows that several genes (e.g., KIAA0821, KIAA0832, KIAA0836 and so on) were expressed in this way. Such brain region-specific or developmentally controlled genes are as interesting as brain-specific genes in a biological sense. While these genes expressed in a regionally or developmentally specific way could not be identified in the previous expression profiling, the inclusion of samples derived from various regions of the central nervous system and from fetal brain in the expression profiling would prevent us from overlooking these biologically interesting genes. Therefore, together with the specific sequence features of the predicted gene products and their chromosomal locations, the expression profiles of new genes in adult tissues, various regions of the central nervous system and fetal brain would provide important clues as to which genes are to be further investigated.

**Acknowledgments:** This project was supported by grants from the Kazusa DNA Research Institute. We thank Tomomi Tajino, Keishi Ozawa, Tomomi Kato, Kazuhiro Sato, Akiko Ukigai, Emiko Suzuki, Kazuko Yamada, Kiyoe Sumi, Takashi Watanabe, Naoko Suzuki, Kozue Kaneko, Naoko Shibano, Taneaki Tsugane and Hisako Takahashi for their technical assistance.

### References

1. Rowen, L., Mahairas, G., and Hood, L. 1997, Sequencing the human genome, *Science*, **278**, 605–607.
2. Nomura, N., Miyajima, N., Sazuka, T. et al. 1994, Prediction of the coding sequences of unidentified human genes. I. The coding sequences of 40 new genes (KIAA0001-0040) deduced by analysis of randomly sampled cDNA clones from human immature myeloid cell line KG-1,

**Figure 3.** Expression profiles of 100 newly identified genes examined by RT-PCR ELISA. The tissue expression levels of the 100 human genes were analyzed by using the RT-PCR ELISA. Panel A: Expression profiles among 10 human adult tissues. Gene names are given as KIAA numbers at the left side of each set of color codes. Tissue names are indicated on above the top sets of color codes. A color conversion panel shown in the right side was used for displaying mRNA levels as color codes. The mRNA levels are expressed in equivalent amounts (fg) of the authentic cDNA plasmids in 1 ng of starting poly(A)<sup>+</sup> RNAs. Panel B: Brain regional and developmental expression profiles of randomly selected 54 genes analyzed above. Besides 10 tissues, 9 regions of the adult central nervous system (amygdala, corpus callosum, cerebellum, caudate nucleus, hippocampus, substantia nigra, subthalamic nucleus, thalamus, and spinal cord) and fetal brain were included in the expression profiling. As a control, mRNA levels in fetal liver were also examined. Gene names and sample names of mRNA origins are indicated in the same way as in panel A.

- DNA Res.*, **1**, 27–35.
3. Nagase, T., Ishikawa, K.-I., Suyama, M. et al. 1998, Prediction of the coding sequences of unidentified human genes. XI. The complete sequences of 100 new cDNA clones from brain which code for large proteins *in vitro*, *DNA Res.*, **5**, 277–276.
  4. Ohara, O., Nagase, T., Ishikawa, K.-I. et al. 1997, Construction and characterization of human brain cDNA libraries suitable for analysis of cDNA clones encoding relatively large proteins, *DNA Res.*, **4**, 53–59.
  5. Ishikawa, K.-I., Nagase, T., Nakajima, D. et al. 1997, Prediction of the coding sequences of unidentified human genes. VIII. 78 new cDNA clones from brain which code for large proteins *in vitro*, *DNA Res.*, **4**, 307–313.
  6. Kozak, M. 1996, Interpreting cDNA sequences: some insights from studies on translation, *Mammalian Genome*, **7**, 563–574.
  7. Sonnhammer, E. L., Eddy, S. R., Birney, E., Bateman, A., and Durbin, R. 1998, Pfam: multiple sequence alignments and HMM-profiles of protein domains, *Nucleic Acids Res.*, **26**, 320–322.
  8. Hirokawa, T., Boon-Chieng, S., and Mitaku, S. 1998, SOSUI: classification and secondary structure prediction system for membrane proteins, *Bioinformatics*, **14**, 378–379.
  9. Chan, A. M.-L., McGovern, E. S., Catalano, G., Fleming, T. P., and Miki, T. 1994, Expression cDNA cloning of a novel oncogene with sequence similarity to regulators of small GTP-binding proteins, *Oncogene*, **9**, 1057–1063.
  10. Huibregtse, J. M., Scheffner, M., Beaudenon, S., and Howley, P. M. 1995, A family of proteins structurally and functionally related to the E6-AP ubiquitin-protein ligase, *Proc. Natl. Acad. Sci. USA*, **92**, 2563–2567.
  11. Lelianaova, V. G., Davletov, B. A., Sterling, A. et al. 1997,  $\alpha$ -latrotoxin receptor, latrophilin, is a novel member of the secretin family of G protein-coupled receptors, *J. Biol. Chem.*, **272**, 21504–21508.
  12. Yogosawa, S., Makino, Y., Yoshida, T., Kishimoto, T., Muramatsu, M., and Tamura, T. 1996, Molecular cloning of a novel 120-kDa TBP-interacting protein, *Biochem. Biophys. Res. Commun.*, **229**, 612–617.
  13. Kim, J. G., Armstrong, R. C., v Agoston, D. et al. 1997, Myelin transcription factor 1 (Myt1) of the oligodendrocyte lineage, along with a closely related CCHC zinc finger, is expressed in developing neurons in the mammalian central nervous system, *J. Neurosci. Res.*, **50**, 272–290.
  14. Roof, D. J., Hayes, A., Adamian, M., Chishti, A. H., and Li, T. 1997, Molecular characterization of abLIM, a novel actin-binding and double zinc finger protein, *J. Cell. Biol.*, **138**, 575–588.
  15. Xue, F. and Cooley, L. 1993, kelch encodes a component of intercellular bridges in *Drosophila* egg chambers, *Cell*, **72**, 681–693.
  16. Barthelemy, I., Carramolino, L., Gutierrez, J., Barbero, J. L., Marquez, G., and Zaballos, A. 1996, zhx-1: a novel mouse homeodomain protein containing two zinc-fingers and five homeodomains, *Biochem. Biophys. Res. Commun.*, **224**, 870–876.
  17. Whitehead, I., Kirk, H., and Kay, R. 1995, Retroviral transduction and oncogenic selection of a cDNA encoding Dbs, a homolog of the Dbl guanine nucleotide exchange factor, *Oncogene*, **10**, 713–721.
  18. Babij, P., Kelly, C., and Periasamy, M. 1991, Characterization of a mammalian smooth muscle myosin heavy-chain gene: complete nucleotide and protein coding sequence and analysis of the 5' end of the gene, *Proc. Natl. Acad. Sci. USA*, **88**, 10676–10680.
  19. Serra-Pages, C., Kedersha, N. L., Fazikas, L., Medley, Q., Debant, A., and Streuli, M. 1995, The LAR transmembrane protein tyrosine phosphatase and a coiled-coil LAR-interacting protein co-localize at focal adhesions, *EMBO J.*, **14**, 2827–2838.
  20. Haffner, C., Takei, K., Chen, H. et al. 1997, Synaptojanin 1: localization on coated endocytic intermediates in nerve terminals and interaction of its 170 kDa isoform with Eps15, *FEBS Lett.*, **419**, 175–180.
